# Supplementary material
Source: publisher figshare collection journal article supplement (https://frontiersin.figshare.com/ndownloader/files/14454674)
Supplement: Supplementary file 1 [file 14454674]

Supplementary Material

**Impacts of ocean acidification on the development of a subtropical zooplankton community during oligotrophic conditions and simulated upwelling**

María Algueró-Muñiz1¶*, Henriette G. Horn1¶, Santiago Alvarez-Fernandez1, Carsten Spisla1,2, Nicole Aberle4, Lennart T. Bach2, Wanchun Guan3, Eric P. Achterberg2, Ulf Riebesell2, Maarten Boersma1,5

*Corresponding author: [maria.alguero@awi.de](mailto:maria.alguero@awi.de)

**(please see below)**

**Supplementary Table 1: Biomass conversion factors**. Only common species (species that represent >0.5% total catch (i.e. > 3540 ind), t1-t55) were considered for mesozooplankton biomass estimation. Carbon content was estimated for *Doliolum* sp. and *Oncaea* sp. from last sampling day (t56) samples.

| MESOZOOPLANKTON | Conversion factor (µg C ind-1) | Reference |
| --- | --- | --- |
| *Clausocalanus* spp./*Paracalanus* spp. | 0.339 | averaged for *Paracalanus* sp. after Uye (2014) |
| Copepoda nauplii | 0.04 | length-carbon relationship for *Oithona similis*, from Sabatini & Kiørboe (1994) |
| *Doliolum* sp. | 2.18 | this study |
| Foraminifera | 0.75 | average for *Elphidium* (Moodley 2000) |
| *Microsetella* spp. | 0.268 | averaged for *Microsetella norvegica* after Uye (2014) |
| *Nannocalanus minor* | 0.339 | based on *Clausocalanus* spp.*/Paracalanus* spp*.* |
| *Oikopleura dioica*; juveniles | 1.178 | averaged for juveniles ~500 µm trunk length after King (1980) |
| *Oithona* spp. | 0.58 | Kiørboe & Sabatini (1994) |
| *Oncaea* spp. | 2.7 | this study |
| MICROZOOPLANKTON | Conversion factor |  |
| Ciliates | 0.76 V0.819 pg C cell-1 | Menden-Deuer & Lessart (2000) |
| Dinoflagellates | 0.19 pg C mL-1 | Putt & Stoecker (1989) |
| PHYTOPLANKTON | Conversion factor (pg C cell-1) |  |
| Dinoflagellates | 0.76 V0.819 | Menden-Deuer & Lessart (2000) |
| Diatoms | 0.288 V0.811 | Menden-Deuer & Lessart (2000) |
| Diverse | 0.216 V0.939 | Menden-Deuer & Lessart (2000) |
